# Supplementary material for: A 561-yr (1461-2022 CE) summer temperature reconstruction for Mid-Atlantic-Northeast USA shows connections to volcanic forcing and atmospheric circulation
Source: Springer Nature journal article supplement (doi:10.1007/s10584-024-03798-z), 2024-09-01
Supplement: 10584_2024_3798_MOESM1_ESM.pdf [file 10584_2024_3798_MOESM1_ESM.pdf]

**Table S1 Tropical and extratropical volcanic eruption event years used for SEA in Figure 6.** List of the largest volcanic eruptions during the period 1461–1900 are based on sulfate records from a collection of ice core records from Greenland and Antarctica. Event years, names, and locations derive from the Volcanoes of the World database (v. 5.1.7; 26 Apr 2024) provided by the Global Volcanism Program and are listed in (93, 87, 88). We also include instrumental-period eruptions since 1900 CE. Temperature anomalies are included for each event either during the eruption year (extratropical) or year following the eruption (tropical).

| <b>Volcano</b>           | <b>Eruption Year</b> | <b>Temp °C</b> | <b>Location</b> |
|--------------------------|----------------------|----------------|-----------------|
| Bároarbunga (Veidivötn)  | 1477                 | -0.29          | Extratropical   |
| Hekla                    | 1510                 | -0.97          | Extratropical   |
| Colima                   | 1585                 | -0.42          | Tropical        |
| Nevado del Ruiz          | 1595                 | -1.01          | Tropical        |
| Huaynaputina             | 1600                 | -0.92          | Tropical        |
| Parker                   | 1641                 | -1.3           | Tropical        |
| Shikotsu (Tarumai)       | 1667                 | -1.51          | Extratropical   |
| Gamkonora                | 1673                 | -1.05          | Tropical        |
| Fujisan                  | 1707                 | -0.20          | Extratropical   |
| Katla                    | 1721                 | -0.15          | Extratropical   |
| Shikotsu (Tarumai)       | 1739                 | 0.55           | Extratropical   |
| Katla                    | 1755                 | -1.11          | Extratropical   |
| Hekla (Bjallagigar)      | 1766                 | -1.84          | Extratropical   |
| Grímsvötn (Laki)         | 1783                 | -0.70          | Extratropical   |
| Tambora                  | 1815                 | -0.80          | Tropical        |
| Galunggung               | 1822                 | -0.28          | Tropical        |
| Babuyan Claro            | 1831                 | -0.48          | Tropical        |
| Cosiguina                | 1835                 | -1.81          | Tropical        |
| Toya (O-Usu)             | 1853                 | 0.37           | Extratropical   |
| Hokkaido-Komagatake      | 1856                 | -0.80          | Extratropical   |
| Makian                   | 1861                 | -0.20          | Tropical        |
| Grímsvötn                | 1873                 | -0.67          | Extratropical   |
| Askja (ÖskjuvatnCaldera) | 1875                 | -0.13          | Extratropical   |
| Krakatau                 | 1883                 | -0.88          | Tropical        |
| Okataina (Tarawera)      | 1886                 | -1.05          | Extratropical   |
| Novarupta                | 1912                 | -1.16          | Extratropical   |
| Agung                    | 1963                 | -0.65          | Tropical        |
| El Chichon               | 1982                 | 0.69           | Tropical        |
| Pinatubo                 | 1991                 | -0.83          | Tropical        |

**Table S2** Chronology site information used in the MANE  $T_{\text{Mar-Sep}}$  reconstruction. Site statistics and location correspond with Figure 1. All collections are *T. canadensis* except for Cape Natural Research Area (*P. rubens*).  $r_{\text{target}}$  = correlation coefficient versus target instrumental data (hatched area from Figure 1),  $r_{\text{local}}$  = correlation coefficient versus local data,  $\beta$  = beta weight, rbar = average Pearson's correlation between all measured series in the chronology, DOI=hyperlink to International Tree Ring Data Bank.  $r_{\text{local}}$  calculated with  $T_{\text{Mar-Sep}}$  data from the nearest CRU TS 4.07  $0.5^\circ$  grid point to each site Lat/Long location.

| Site Name                          | $r_{\text{target}}$ | $\beta$ | $r_{\text{local}}$ | Lat ( $N^\circ$ ) | Long. ( $W^\circ$ ) | Start | End  | rbar | DOI   |
|------------------------------------|---------------------|---------|--------------------|-------------------|---------------------|-------|------|------|-------|
| Alan Seeger Natural Area           | 0.59                | 0.09    | 0.54               | 40.70             | -77.75              | 1609  | 2013 | 0.33 | —     |
| Alander Mountain                   | 0.68                | 0.12    | 0.69               | 42.09             | -73.51              | 1779  | 2005 | 0.42 | —     |
| Bear Run Nature Preserve           | 0.65                | 0.11    | 0.50               | 39.90             | -79.44              | 1646  | 2020 | 0.34 | —     |
| Bigelow Pond                       | 0.46                | 0.06    | 0.36               | 41.96             | -73.22              | 1655  | 1986 | 0.33 | CT001 |
| Bigelow Pond Recollect             | 0.44                | 0.05    | 0.38               | 41.96             | -73.22              | 1646  | 2012 | 0.36 | CT004 |
| Boody Pond                         | 0.44                | 0.05    | 0.42               | 44.57             | -69.98              | 1747  | 2012 | 0.28 | ME042 |
| Boody Pond Update                  | 0.56                | 0.09    | 0.53               | 44.57             | -69.98              | 1768  | 2022 | 0.45 | —     |
| Bradbury Mountain State Park       | 0.41                | 0.05    | 0.46               | 43.90             | -70.18              | 1896  | 2012 | 0.46 | ME043 |
| Cape Research Natural Area         | 0.52                | 0.06    | 0.50               | 43.81             | -72.98              | 1811  | 2009 | 0.35 | —     |
| Dingmans Falls                     | 0.44                | 0.05    | 0.49               | 41.23             | -74.89              | 1607  | 2020 | 0.28 | —     |
| East Branch Swamp Natural Area     | 0.37                | 0.04    | 0.46               | 41.23             | -77.77              | 1511  | 1981 | 0.30 | PA004 |
| Ferncliff Peninsula Natural Area   | 0.43                | 0.05    | 0.51               | 39.87             | -79.50              | 1623  | 2020 | 0.35 | —     |
| Gibbs Brook                        | 0.63                | 0.11    | 0.70               | 44.22             | -71.40              | 1660  | 2013 | 0.34 | NH002 |
| Granville Gulf State Forest        | 0.38                | 0.04    | 0.39               | 44.02             | -72.83              | 1633  | 1981 | 0.35 | VT002 |
| Granville Gulf State Forest Update | 0.57                | 0.09    | 0.61               | 44.02             | -72.83              | 1785  | 2020 | 0.45 | —     |
| Little Concord Pond                | 0.45                | 0.07    | 0.48               | 44.43             | -70.53              | 1681  | 2012 | 0.36 | ME045 |
| Little Concord Pond Update         | 0.47                | 0.07    | 0.42               | 44.43             | -70.53              | 1761  | 2022 | 0.50 | —     |
| Mattawamkeag Wilderness Park       | 0.45                | 0.05    | 0.46               | 45.52             | -68.28              | 1677  | 2012 | 0.46 | ME046 |
| Nancy Brook                        | 0.48                | 0.07    | 0.52               | 44.12             | -71.37              | 1627  | 2021 | 0.31 | —     |
| Pack Forest                        | 0.57                | 0.09    | 0.64               | 43.56             | -73.81              | 1542  | 2021 | 0.29 | —     |
| Paradise Point Trail               | 0.42                | 0.05    | 0.40               | 43.70             | -71.78              | 1643  | 2021 | 0.39 | —     |
| Ricketts Glen State Park           | 0.63                | 0.10    | 0.65               | 41.31             | -76.28              | 1621  | 2020 | 0.36 | —     |
| Salt Springs State Park            | 0.28                | 0.02    | 0.31               | 41.91             | -75.87              | 1620  | 1981 | 0.40 | PA011 |
| Snyder Middleswarth Natural Area   | 0.51                | 0.08    | 0.55               | 40.81             | -77.29              | 1762  | 2020 | 0.32 | —     |
| Spruce Glen                        | 0.64                | 0.11    | 0.68               | 41.73             | -74.24              | 1654  | 2021 | 0.29 | —     |
| Swallow Falls State Park           | 0.49                | 0.06    | 0.47               | 39.50             | -79.42              | 1694  | 2020 | 0.30 | —     |
| Sweetroot Natural Area             | 0.45                | 0.05    | 0.46               | 39.84             | -78.52              | 1612  | 1981 | 0.27 | PA012 |
| Tionesta                           | 0.49                | 0.05    | 0.51               | 41.50             | -79.43              | 1461  | 1978 | 0.28 | PA013 |
| Tionesta Update                    | 0.62                | 0.11    | 0.63               | 41.50             | -79.43              | 1603  | 2021 | 0.26 | —     |

**Table S3** Nested reconstruction model statistics. Northeast US  $T_{\text{Mar-Sep}}$  nested reconstruction model statistics, including the common period model (CP) with backward (B) and forward (F) model nests for the period 1461-2021 CE. # CRNS=number of tree-ring chronologies, # CORES=number of individual tree cores,  $\text{CR}^2/\text{VR}^2$ =calibration/verification period coefficient of determination,  $\text{VRE}/\text{VCE}$ =verification period reduction of error/coefficient of efficiency,  $\text{RMSE}$ =root mean-squared error

| Nest | Period    | # CRNS | # CORES | $\text{CR}^2$ | $\text{VR}^2$ | VRE  | VCE  | RMSE |
|------|-----------|--------|---------|---------------|---------------|------|------|------|
| F8   | 2020-2021 | 2      | 55      | 0.18          | 0.10          | 0.11 | 0.06 | 0.68 |
| F7   | 2014-2020 | 8      | 227     | 0.46          | 0.38          | 0.41 | 0.38 | 0.55 |
| F6   | 2012-2013 | 15     | 406     | 0.50          | 0.45          | 0.46 | 0.38 | 0.52 |
| F5   | 2006-2012 | 16     | 426     | 0.56          | 0.45          | 0.47 | 0.44 | 0.51 |
| F4   | 1987-2005 | 17     | 466     | 0.57          | 0.52          | 0.54 | 0.52 | 0.48 |
| F3   | 1982-1986 | 23     | 597     | 0.53          | 0.52          | 0.53 | 0.51 | 0.46 |
| F2   | 1979-1981 | 24     | 812     | 0.61          | 0.65          | 0.65 | 0.64 | 0.41 |
| F1   | 1977-1978 | 28     | 947     | 0.62          | 0.66          | 0.67 | 0.66 | 0.41 |
| CP   | 1896-1976 | 29     | 983     | 0.62          | 0.67          | 0.67 | 0.66 | 0.41 |
| B1   | 1790-1895 | 28     | 801     | 0.62          | 0.67          | 0.67 | 0.66 | 0.41 |
| B2   | 1780-1789 | 27     | 415     | 0.62          | 0.68          | 0.67 | 0.66 | 0.41 |
| B3   | 1770-1779 | 26     | 395     | 0.61          | 0.67          | 0.67 | 0.66 | 0.42 |
| B4   | 1750-1769 | 23     | 360     | 0.62          | 0.70          | 0.69 | 0.68 | 0.41 |
| B5   | 1700-1749 | 22     | 300     | 0.62          | 0.69          | 0.69 | 0.68 | 0.41 |
| B6   | 1690-1699 | 21     | 168     | 0.62          | 0.68          | 0.68 | 0.67 | 0.41 |
| B7   | 1680-1689 | 19     | 144     | 0.63          | 0.68          | 0.68 | 0.67 | 0.41 |
| B8   | 1660-1679 | 18     | 116     | 0.63          | 0.67          | 0.67 | 0.67 | 0.41 |
| B9   | 1650-1659 | 15     | 77      | 0.59          | 0.63          | 0.63 | 0.62 | 0.43 |
| B10  | 1640-1649 | 12     | 61      | 0.58          | 0.62          | 0.63 | 0.62 | 0.44 |
| B11  | 1630-1639 | 11     | 52      | 0.53          | 0.63          | 0.63 | 0.62 | 0.43 |
| B12  | 1620-1629 | 8      | 46      | 0.56          | 0.61          | 0.61 | 0.60 | 0.44 |
| B13  | 1610-1619 | 6      | 39      | 0.55          | 0.63          | 0.63 | 0.62 | 0.45 |
| B14  | 1550-1609 | 3      | 28      | 0.41          | 0.47          | 0.47 | 0.45 | 0.51 |
| B15  | 1520-1549 | 2      | 9       | 0.20          | 0.37          | 0.32 | 0.30 | 0.60 |
| B16  | 1461-1519 | 1      | 5       | 0.18          | 0.36          | 0.28 | 0.26 | 0.60 |

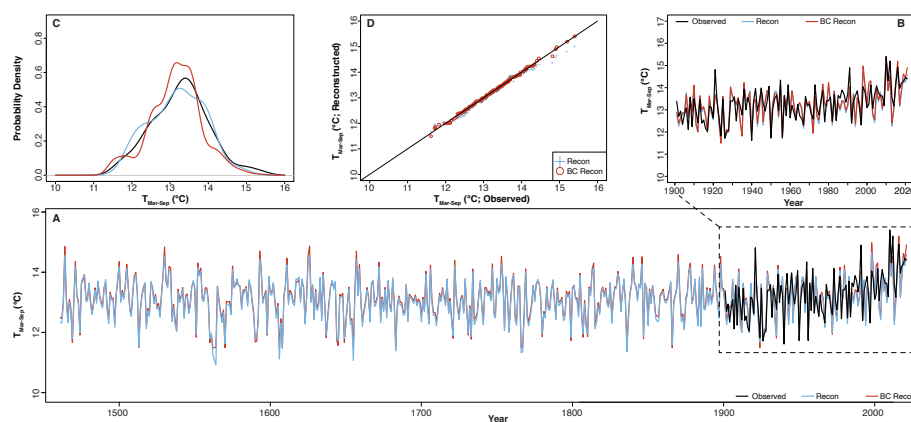

**Fig. S1** MANE  $T_{\text{Mar-Sep}}$  reconstruction bias correction. (A) Time series of uncorrected (blue) and bias-corrected (BC; red)  $T_{\text{Mar-Sep}}$  reconstruction spanning 1461–2021 CE plotted with instrumental Mar-Sep CRU TS4.07  $T_{\text{Mar-Sep}}$  data during the period 1901–2021 (black) [zoom inset shown as (B)]. (C) Probability density functions for the uncorrected (blue) and bias-corrected and instrumental data (black). (D) Quantile-quantile plot of the uncorrected (blue) and bias-corrected (red) reconstructions.

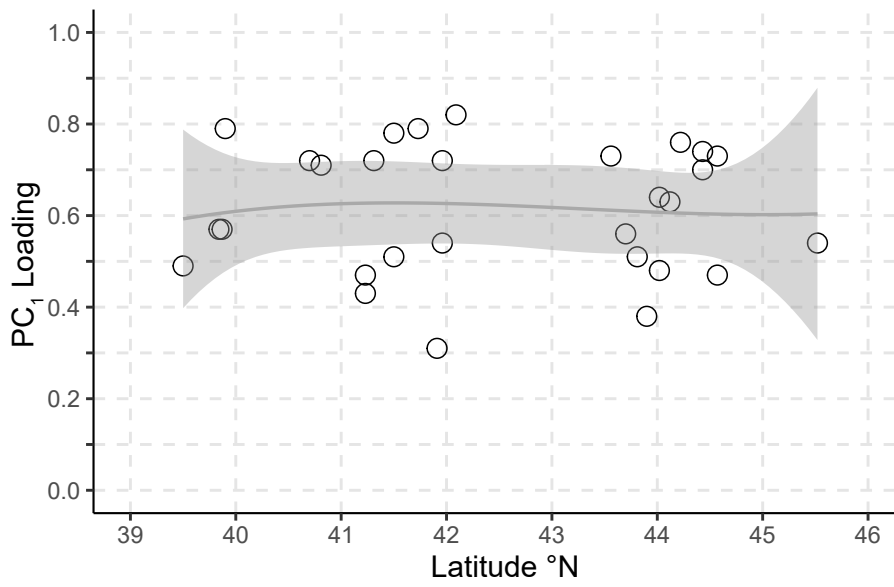

**Fig. S2** MANE LWBI network PC<sub>1</sub> loadings versus latitude. PC<sub>1</sub> loadings of the 29 predictor sites plotted against site latitude. Solid gray line is a 2<sup>nd</sup>-order polynomial function with 2- $\sigma$  error (gray envelop) to show non-linear relationship between latitude and loadings.

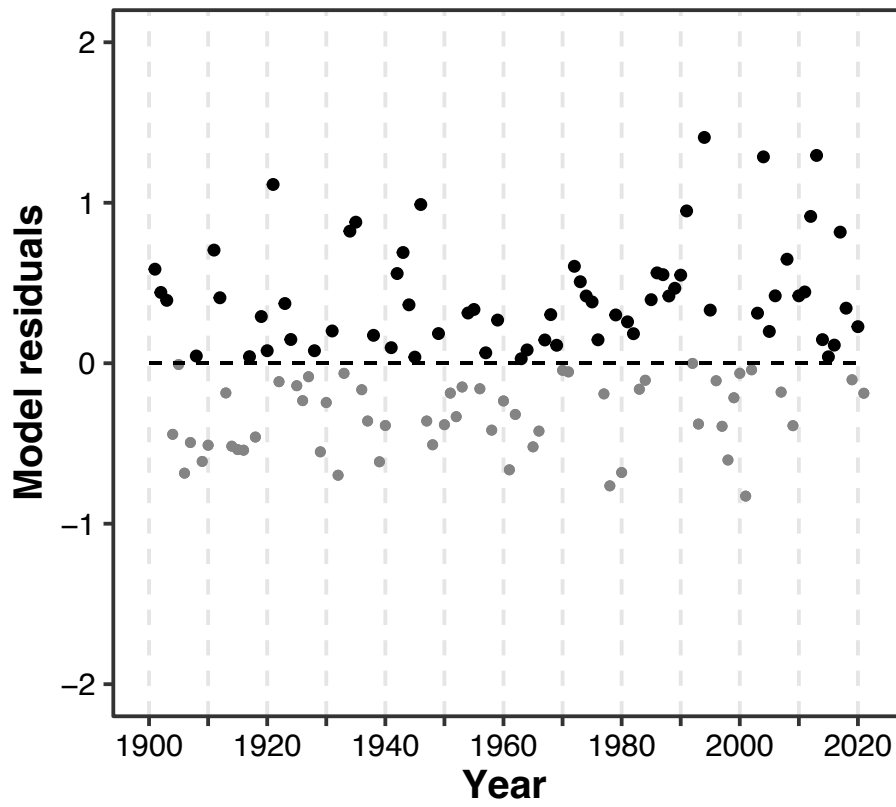

Fig. S3 MANE  $T_{\text{Mar-Sep}}$  reconstruction model (bias corrected) residuals. Predicted values subtracted from actual values (CRU TS4.07; (43)) during the period 1901-2021. Positive (black dot) values are underpredictions and negative (gray dot) values are overpredictions.

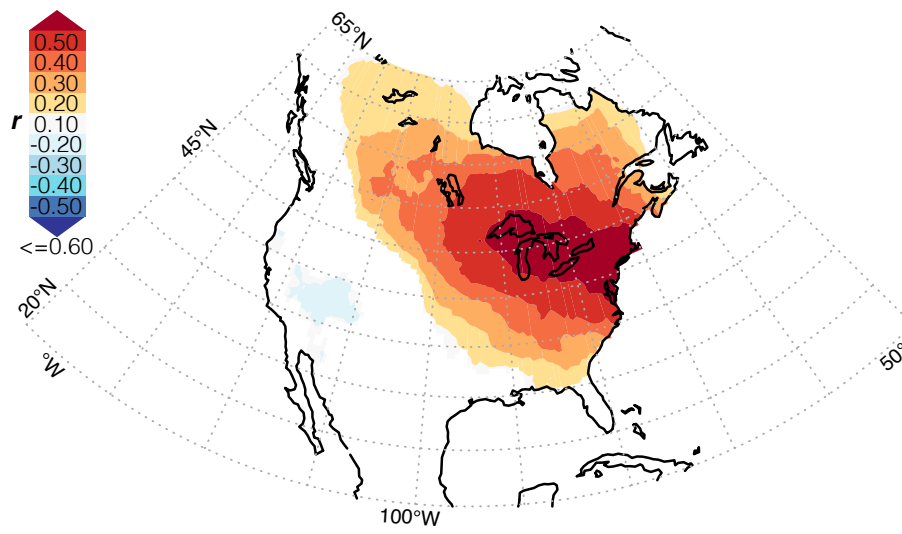

**Fig. S4 Spatial footprint of the MANE  $T_{\text{Mar-Sep}}$  reconstruction.** Map showing the spatial Pearson's correlation ( $p < 0.01$ ; 1<sup>st</sup>-differenced) between  $PC_1$  of the LWBI records included in the MANE network and gridded CRU TS4.07  $T_{\text{Mar-Sep}}$  during the period 1901–1976. Site information for each location is available in Table S2.
